# Supplementary material for: Ncl Synchronously Regulates Na+, K+, and Cl− in Soybean and Greatly Increases the Grain Yield in Saline Field Conditions
Source: PubMed Central journal article supplement (PMC4705485; doi:10.1038/srep19147), 2016-01-08
Supplement: srep19147-s1.pdf [file srep19147-s1.pdf]

Supplementary Information File

***Ncl* synchronously regulates Na<sup>+</sup>, K<sup>+</sup>, and Cl<sup>-</sup> in soybean and greatly increases the grain yield in saline field conditions**

Tuyen Duc Do, Huatao Chen, Hien Thi Thu Vu, Aladdin Hamwiah, Tetsuya Yamada, Tadashi Sato, Yongliang Yan, Hua Cong, Mariko Shono, Kazuhiro Suenaga & Donghe Xu\*

\*To whom correspondence should be addressed. E-mail: xudh@jircas.affrc.go.jp

This PDF file includes:

Supplementary Figures 1–8, Supplementary Tables 1–2, and Reference 46

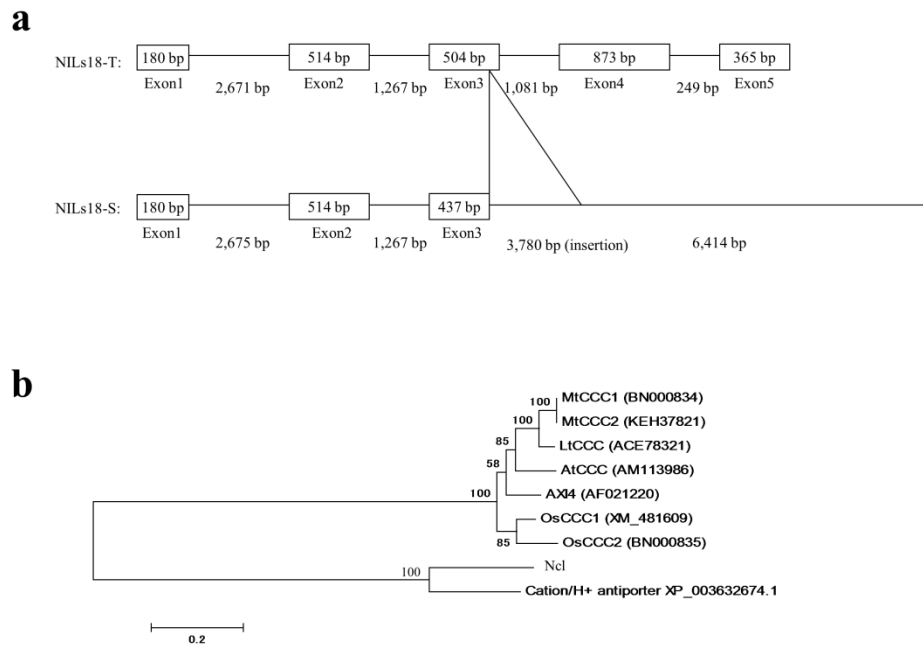

**Supplementary Figure S1. *Ncl* structure and its phylogenetic relationships with other genes.** (a) *Ncl* structure in tolerant (NILs18-T) and sensitive line (NILs18-S). Boxes: coding sequence; line: introns. Gene structure was determined by comparison of genomic and cDNA sequences of *Ncl* in tolerant (NILs18-T) and sensitive (NILs18-S) lines. (b) Phylogenetic tree of *Ncl* and the plant cation-chloride cotransporter genes constructed using MEGA 6.0<sup>46</sup> with neighbor-joining and 1,000 bootstrap replicates. Previously reported cation-chloride cotransporter sequences are retrieved from the NCBI database.

```

NILs18-T 1 : ----TTTT GTTTAATTT CTAATAAC TAACACAGCA ACAAGCACTG AGTCTTTGGC
          *****
NILs18-S 1 : ATCTGTTTT GTTTAATTT CTAATAAC TAACACAGCA AGAAGCACTG AGTCTTTGGC
NILs18-T 56 : CATGACGTTT AACGCGAGCA CCATCACAA GCGGTCGGAA GGAGCCTGGC AGGGCGATAA
          *****
NILs18-S 61 : CATGACGTTT AACGCGAGCA CCATCACAA GCGGTCGGAA GGAGCCTGGC AGGGCGATAA
          *****
NILs18-T 116 : TCCCTGAAC CAGGCTCTTC CTTTGTGAT CGTTCAAACC ATCCTCGTAG TCTTCGTGAG
          *****
NILs18-S 121 : TCCCTGAAC CAGGCTCTTC CTTTGTGAT CGTTCAAACC ATCCTCGTAG TCTTCGTGAG
NILs18-T 176 : CCGCACACT GCCTTTCTCC TCAAACCTT TCGTCAACCT AAAGTTGTGC CCGAGATTAT
          *****
NILs18-S 181 : CCGCACACT GCCTTTCTCC TCAAACCTT TCGTCAACCT AAAGTTGTGC CCGAGATTAT
NILs18-T 236 : TGGTGAATT TTGTTGGGG CTTCTGCTAT TGGGCGCAAC AAGAAATCA TGCACATAGT
          *****
NILs18-S 241 : TGGTGAATT TTGTTGGGG CTTCTGCTAT TGGGCGCAAC AAGAAATCA TGCACATAGT
NILs18-T 296 : GTTCCAGCA TGGAGACTA CCATGCTGGA ATCAGTGGCA AGCTTCGGCC TCTTATTCTA
          *****
NILs18-S 301 : GTTCCAGCA TGGAGACTA CCATGCTGGA ATCAGTGGCA AGCTTCGGCC TCTTATTCTA
NILs18-T 356 : TCTATTCTG GTGGCCTAG AGCTCGACTT TCGCACCAAT CGCCGGAGCG GCAAGCAAGC
          *****
NILs18-S 361 : TCTATTCTG GTGGCCTAG AGCTCGACTT TCGCACCAAT CGCCGGAGCG GCAAGCAAGC
NILs18-T 416 : CTTCAACATC GCGGTGGCCG GAATAACCTT CCCCTTCATC TCGCCCGTGG GAGTAACGTT
          *****
NILs18-S 421 : CTTCAACATC GCGGTGGCCG GAATAACCTT CCCCTTCATC TCGCCCGTGG GAGTAACGTT
NILs18-T 476 : CCTTCTCCAG AGAGCCATCC GCTCTGAAAA CCATAACATA GGGTACGTTT AGCACTTCGT
          *****
NILs18-S 481 : CCTTCTCCAG AGAGCCATCC GCTCTGAAAA CCATAACATA GGGTACGTTT AGCACTTCGT
NILs18-T 536 : GTTCTTAGGG GTATCTCTGT CCATCACGGC TTCCCTGTG CTGCGCGCA TCTTAGCGGA
          *****
NILs18-S 541 : GTTCTTAGGG GTATCTCTGT CCATCACGGC TTCCCTGTG CTGCGCGCA TCTTAGCGGA
NILs18-T 596 : GCTCAAACCT CTGACCACAC GTGTGGGAGA AACCGCCATG GCGGCTGCAG CCTTCAACGA
          *****
NILs18-S 601 : GCTCAAACCT CTGACCACAC GTGTGGGAGA AACCGCCATG GCGGCTGCAG CCTTCAACGA
NILs18-T 656 : CGTCGCTGCG TGGGTTTTGT TGGCCTTGGC GGTGGCTTTG GCTGCCAGG GACACAAAAG
          *****
NILs18-S 661 : CGTCGCTGCG TGGGTTTTGT TGGCCTTGGC GGTGGCTTTG GCTGCCAGG GACACAAAAG
NILs18-T 716 : CAGCTTGTG ACATCAATAT GGGTGTCTT CTCAGGATG GCGTTTGTG CAGCATGAT
          *****
NILs18-S 721 : CAGCTTGTG ACATCAATAT GGGTGTCTT CTCAGGATG GCGTTTGTG CAGCATGAT
NILs18-T 776 : GATCCTGGTT CGACCGGTTA TGAACCGTGT TGCTCGAAG TGTCTCAGG AACAAAGACT
          *****
NILs18-S 781 : GATCCTGGTT CGACCGGTTA TGAACCGTGT TGCTCGAAG TGTCTCAGG AACAAAGACT
NILs18-T 836 : GTTACCCGAA ATCTACATAT GTTAACTCT AGCGGGAGTA ATGTTATCGG GGTTAGTGAC
          *****
NILs18-S 841 : GTTACCCGAA ATCTACATAT GTTAACTCT AGCGGGAGTA ATGTTATCGG GGTTAGTGAC
NILs18-T 896 : AGACATGATA GGGTTACATT CAATTTTCGG GGGATTGTT TTCGGGCTAA CGATACCGAA
          *****
NILs18-S 901 : AGACATGATA GGGTTACATT CAATTTTCGG GGGATTGTT TTCGGGCTAA CGATACCGAA
NILs18-T 956 : AGGTGGCGAA TTTGCAATA GAATGACGAG GAGGATTGAG GACTTCGTGT CCACGTTGTT
          *****
NILs18-S 961 : AGGTGGCGAA TTTGCAATA GAATGACGAG GAGGATTGAG GACTTCGTGT CCACGTTGTT
NILs18-T 1016 : CCTTCCCTTG TACTTTGCTG CCAGTGGTTT GAAAAGTAC GTGACTAAGT TACGAAGCGT
          *****
NILs18-S 1021 : CCTTCCCTTG TACTTTGCTG CCAGTGGTTT GAAAAGTAC GTGACTAAGT TACGAAGCGT
NILs18-T 1076 : GGTGGATTGG GGGCTTCTTT TGCTGGTTAC GTCCACCGCG AGCGTGGGGA AGATTTTGGG
          *****
NILs18-S 1081 : GGTGGATTGG GGGCTTCTTT TGCTGGTTAC GTCCACCGCG AGCGTGGGGA AGATTTTGGG
NILs18-T 1136 : AACGTTTGGC GTGGCGATGA TGTGCATGGT GCCGGTGAAG GAATCCTTGA CGCTTGGAGT
          *****
NILs18-S 1141 : AACGTTTGGC GTGGCGATGA TGTGCATGGT GTTGAAAAAT AAAAATAAAT GAAGAAAAAT
          *****
NILs18-T 1196 : GTTAATGAAC ACCAAAGGGT TGGTGGAGCT AATCGTTCTC AATATTGGCA GAGA-----
          *****
NILs18-S 1201 : AAATATGAAG AAGATGCACA GTCTGAATT AAATAACAAA AAAAAAATAA AAAA

```

**Supplementary Figure S2. Alignment of the *Ncl* cDNA sequences in tolerant (NILs18-T) and sensitive line (NILs18-S). The putative polyadenylation signal sequences in NILs18-S are underlined. The arrow indicates the start codon ATG.**

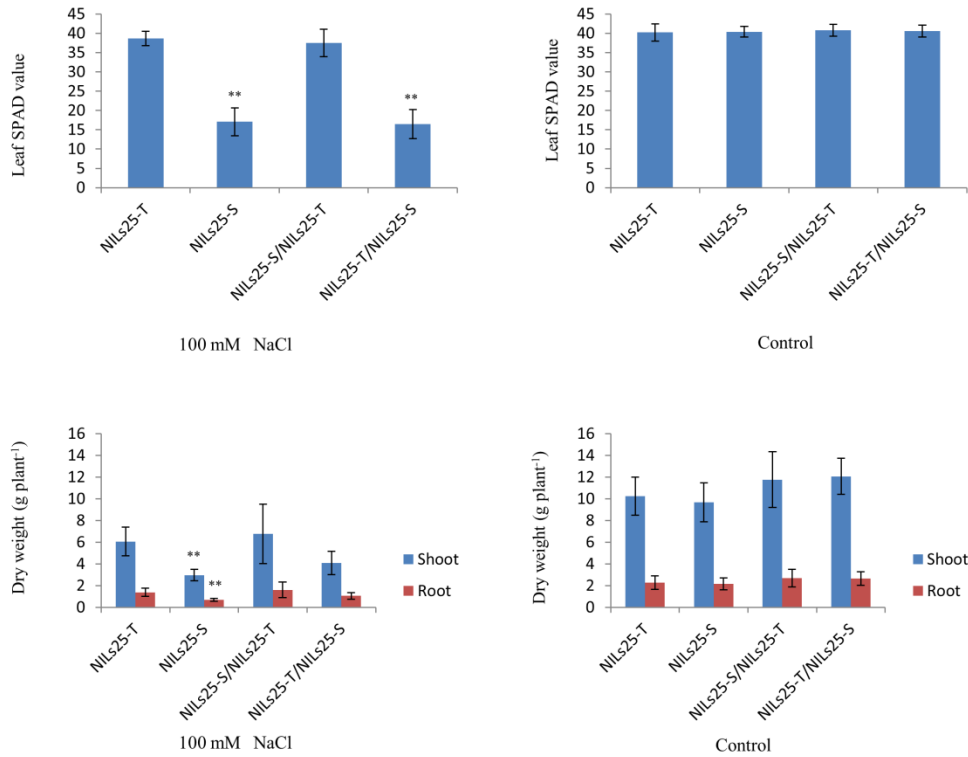

**Supplementary Figure S3. Comparison of salt tolerance for salt tolerant near isogenic lines NILs25-T and NILs25-S and their graft hybrids NILs25-T/NILs25-S and NILs25-S/NILs25-T in terms of leaf SPAD value and dry weight for shoot and root.** All the lines were evaluated in a hydroponic condition with 100 mM NaCl and 0 mM NaCl (Control). Data are shown as mean  $\pm$  s.d. ( $n = 6$ ). \*\* indicate significant differences versus NILs25-T at  $P < 0.01$  level based on Dunnett's multiple comparison test.

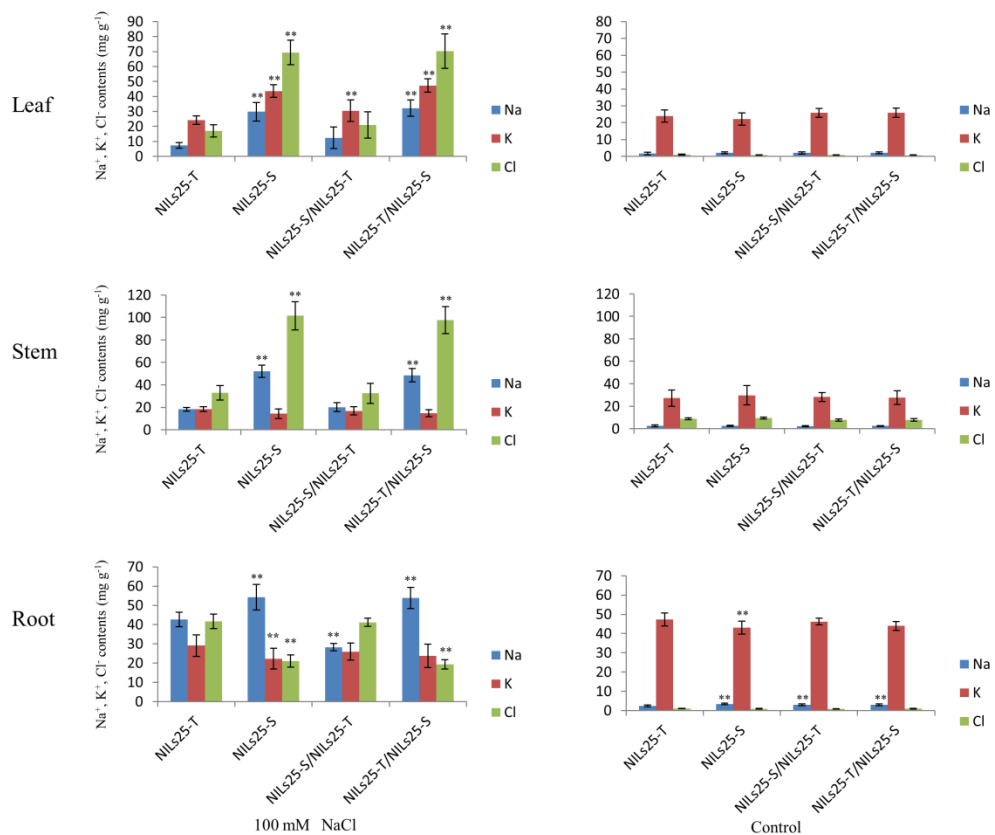

**Supplementary Figure S4. Na<sup>+</sup>, K<sup>+</sup>, and Cl<sup>-</sup> contents in leaves, stems, and roots in salt tolerant near isogenic lines NILs25-T and NILs25-S and their graft hybrids NILs25-T/NILs25-S and NILs25-S/NILs25-T.** All the lines were evaluated in a hydroponic condition with 100 mM NaCl and 0 mM NaCl (Control). Data are shown as mean  $\pm$  s.d. ( $n = 6$ ). \*\* indicates significant differences versus NILs25-T at  $P < 0.01$  levels based on Dunnett's multiple comparison test.

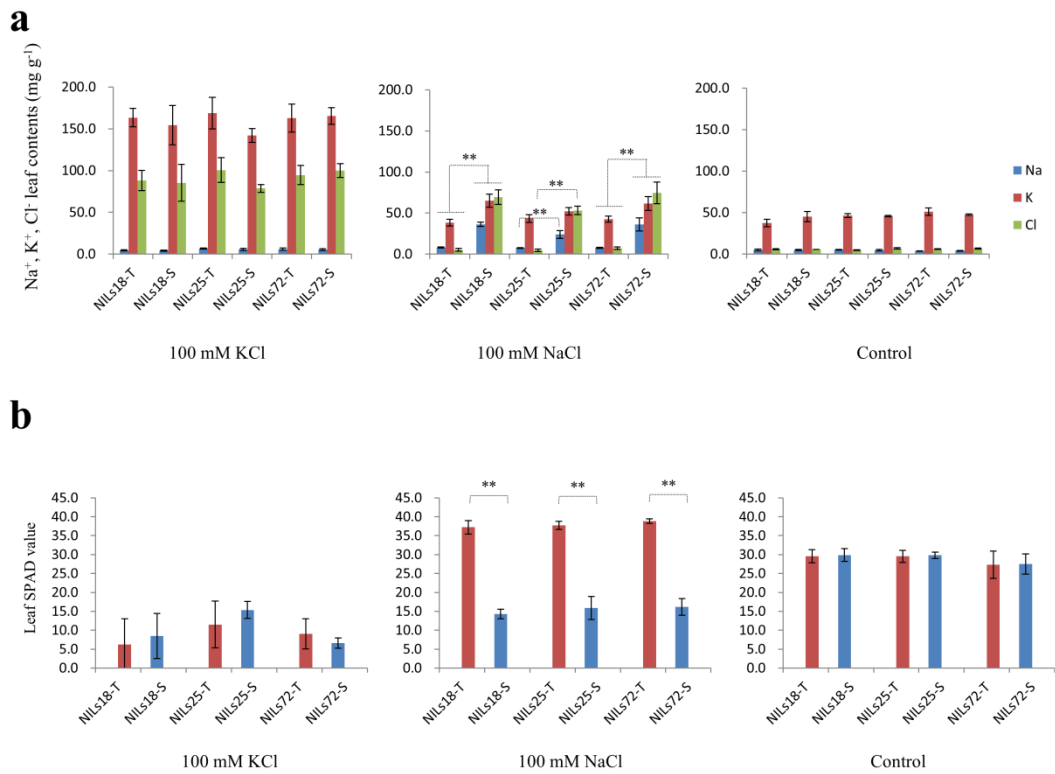

**Supplementary Figure S5. Na<sup>+</sup>, K<sup>+</sup>, and Cl<sup>-</sup> contents in leaves (a) and leaf SPAD values (b) in the three sets of salt tolerant near isogenic lines after treatment with 100 mM KCl, 100 mM NaCl, and CK for about three weeks in a hydroponic condition. Data are shown as mean  $\pm$  s.d. ( $n = 6$ ). \*\*: Significant difference ( $P < 0.01$ ) based on ANOVA (Tukey's multiple comparison test).**

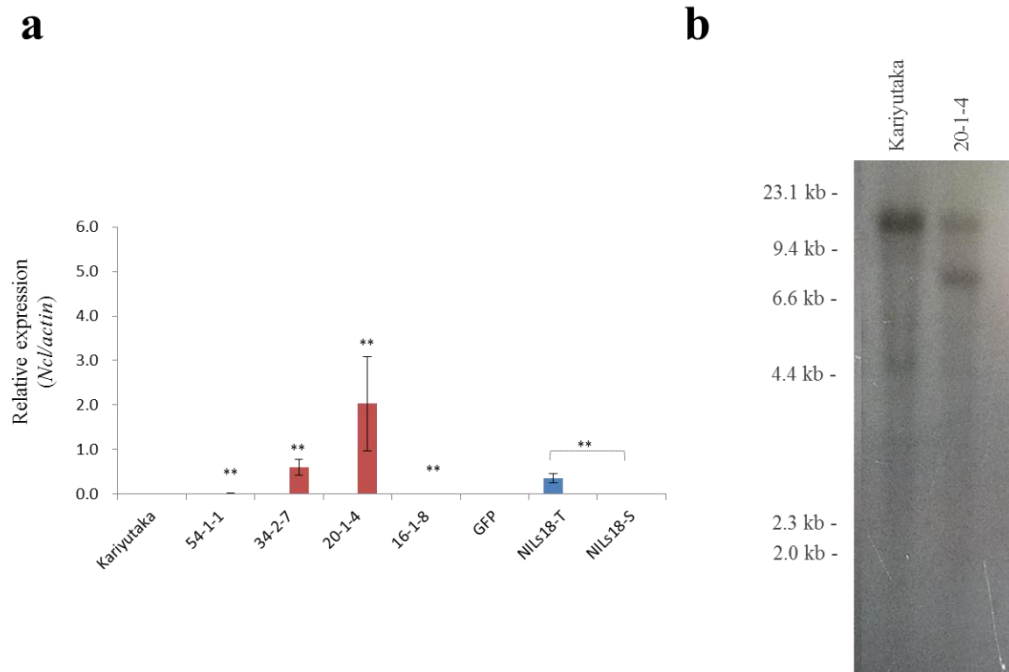

**Supplementary Figure S6. Transgene expression in 35S:*Ncl* transgenic lines in a control condition and Southern blot analysis of the 35S:*Ncl* transgenic line 20-1-4.** (a) 54-1-1, 34-2-7, 20-1-4, and 16-1-8 are T<sub>2</sub> 35S:*Ncl* transgenic plants. Kariyutaka: wild-type soybean cultivar. GFP is 35S:*GFP* transgenic line (T<sub>6</sub>). NILs18-T and NILs18-S are tolerant and sensitive near isogenic lines. Values represent means from three biological replicates. Data are expressed as means  $\pm$  s.d. \*\* indicates significant difference at  $P < 0.01$  levels versus Kariyutaka (Dunnett's multiple comparison test). (b) Southern blot analysis of the 35S:*Ncl* transgenic line 20-1-4. Genomic DNAs were digested with *Xba*I. DNA was blotted on a membrane and hybridized with *Ncl* gene, which has only one *Xba*I restriction site.

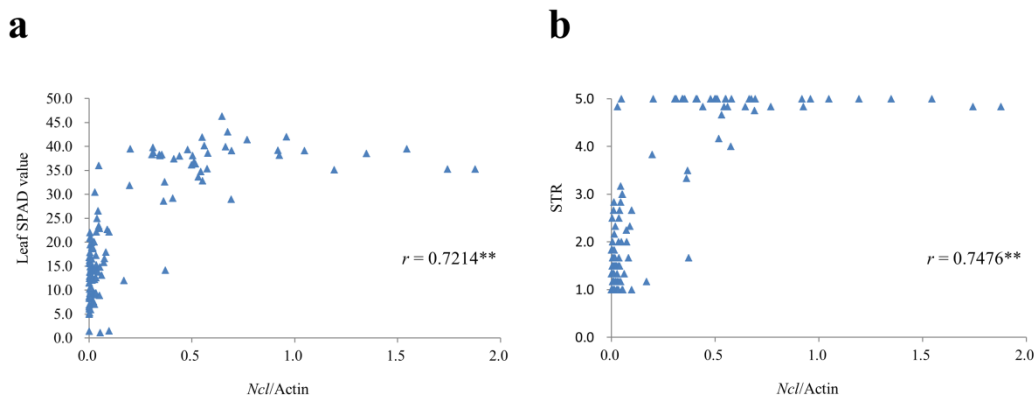

**Supplementary Figure S7. Associations of expression level of *Ncl* with salt tolerance in terms of leaf SPAD value (a) and salt tolerance rating (STR) (b) in 123 soybean accessions from different countries.** X-axis: real-time quantitative RT-PCR analysis of *Ncl*. Relative expression values of soybean *actin* are shown. RNA samples were collected from three plants for each line after 1 day of treatment with 100 mM NaCl in a hydroponic condition. Y-axis: leaf SPAD values and salt tolerance rating (STR). Values represent means from three different plants. Data were recorded after treatment with 100 mM of NaCl for approximately 3 weeks in a hydroponic condition. The STR scale was classified into five grades, ranging from 1 to 5 (1, plants completely dead; 2, two-thirds or more leaves showed chlorosis symptoms or only upside leaf survive; 3, half or less leaves showed chlorosis symptoms; 4, one-third or less leaves showed chlorosis symptoms; 5, plants with normal healthy leaves).



2009

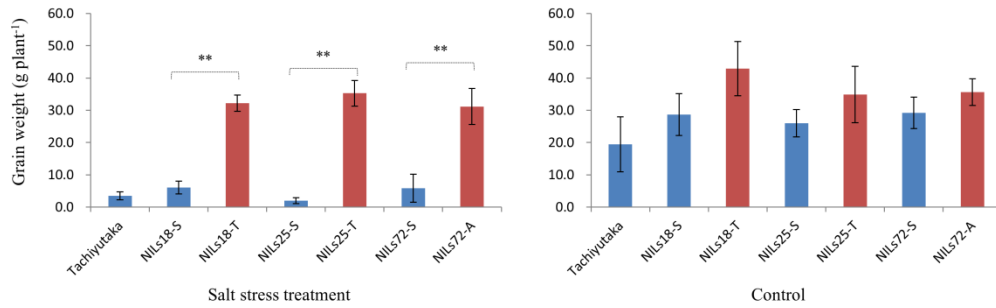

**Supplementary Figure S8. Yield performances of lines carrying *Ncl* in a saline field condition in Miyagi Prefecture, Japan, in 2009.** The three sets of NILs were planted in saline and control conditions. Data are shown as mean  $\pm$  s.d. from three replicates. \*\*: Significant difference ( $P < 0.01$ ) based on ANOVA (Tukey's multiple comparison test).

**Supplementary Table S1.** Primers used in this study

| Name               | Sequences (5'-----3')                               | Purpose      |
|--------------------|-----------------------------------------------------|--------------|
| Satt255            | GCGCTTTTAGCGTCGTCCTGGC<br>TACCCCTCTCTTATTCTTCTT     | Fine mapping |
| SSR192904          | TCAAAACACATTTATGCAATTCG<br>CAAAATTTGATACACACAAGAGGA |              |
| SSR192274          | CATGTGCAGTCGGTAGTTCTG<br>TAGGCAATGGCCACATACAA       |              |
| SSR174411          | CGGTGGTGATCGATTTTTTCT<br>AATCCGCGTGAAGTGAAGTGA      |              |
| SSR154279          | CACTCATGCCAACAGTGTCA<br>GCAATTTAACGTTGAAGTCGAT      |              |
| SSR128010          | CAACCAACAGGAGTTGGGTAT<br>CCTAAAGAGCCTCCTTCTCACA     |              |
| SSR97977           | TGAGCCCAAATTGTGAATGA<br>AACCTCTGAAGCACGGACAT        |              |
| BARCSOYSSR_03_1336 | GGCAGTGCTGTGAAAACCTCA<br>AGAACCCATGACAAAACTTGA      |              |
| BARCSOYSSR_03_1337 | ACCAGCTCGTGTGTGTGTTTT<br>CGCTCTCTCTATGCCTCCAC       |              |
| BARCSOYSSR_03_1338 | GCATTGGTTCCTTTTCTCATGT<br>TGTTTTGACAAGGTGATTTTCA    |              |
| CDS3CAPS           | CGATGAAATGTTGCAATCTT<br>TTGGCCCAGTTGACCGTA          |              |
| SSR25.8            | TTAAGCACCAGCAAATAGTTC<br>CGACCAACTATTCCCATATAC      |              |
| SSR222042          | TTGAGTCTTTTCCTTTTTGAAGA<br>CGGCTCGATTTGACTTGATT     |              |
| 3.8-kb-indel       | CTCGCAAGTGTTCACGAA<br>TTAGCTCCACCAACCCTTG           |              |
| CAPS42.4           | GACATCAAGGGCCGAGAGTA<br>TGAACACGTGGTTCCTGTTT        |              |
| SSR48.2            | CCTGTTAGTGGTTAATTCGAT<br>TTAAATCTTCGAATGGTTGG       |              |
| SSR55.5            | TTGGATAGTAATGTTGTCTTCG<br>AAGAAAAGTGATGTGACTTGA     |              |

|                    |                                                                  |                            |
|--------------------|------------------------------------------------------------------|----------------------------|
| BARCSOYSSR_03_1341 | TTTCATATCCCTTGCCCTTG<br>CGAAATAACACCCACCATCC                     |                            |
| BARCSOYSSR_03_1342 | GTCAACAGAACCGAGACCGT<br>ATTCACATCCTGAGCTTGGC                     |                            |
| SSR166805          | TTGTCTTTAGGTGAAACAACTTTTTA<br>CAAGTAACCTATCTATTTTCGCACA          |                            |
| SSR112166          | TCCATAAATAGGTTGCCAGTTG<br>TCAAACGAGAGGAGTGTTTTGA                 |                            |
| SSR96530           | AAGTTTCCCCATTTTCGTTT<br>TCCCTTTTCTATGAACTCCAACA                  |                            |
| Sat_091            | CTTCTGGATAGTTGGGACTGATA<br>GGAACAGGTCGTGAAAAGTTAT                |                            |
| 2CDS3Up            | GTTACCCGAAATCTACATATGTTTAACTCTA                                  | 3'-RACE and 5'-RACE        |
| Ada-P              | ATTCGAGACGTCTGGTACGC                                             |                            |
| Ada-dT             | ATTCGAGACGTCTGGTACGCTTTTTTTTTT                                   |                            |
| 5RACE-P            | (P)GATAACATTACT                                                  |                            |
| S1                 | CTTCTCAGGGATGGCGTTT                                              |                            |
| A1                 | ACGTGTGGTCAGCAGTTTGA                                             |                            |
| S2                 | CTCGCAAGTGTCTCACGAA                                              |                            |
| A2                 | TCTCGGCGACAACTTTAGGT                                             |                            |
| qNaClV             | TCTCCACTGACGTAAGGGATG<br>CACTGATTCCAGCATGGTAGTGC                 | Transgenic plant selection |
| Glyma03g32900_GXL  | TTCTTGCGACTCTTGCTCTATAAGAATACC<br>CCTTTGTTTATTTTCATGTGGGAGTGATTT | Genomic DNA<br>sequencing  |
| Glyma03g32900_CDS6 | CCACCAACATGTCACGACTC<br>ACCCACGATTGACTAGCAC                      | RT-PCR/qPCR                |
| Glyma03g32900_CDS3 | GTTTGTTGCAGCCATGATGA<br>AATCCACCACGCTTCGTAAC                     |                            |
| SoyAct             | GTTCTCTCCTTGTATGCAAGTG<br>CCAGACTCATCATATTCACCTTTAG              |                            |
| SoyActin           | GAGCTATGAATTGCCTGATGG<br>CGTTTCATGAATCCAGTAGC                    |                            |
| Satt339            | TAATATGCTTTAAGTGGTGTGGTTATG<br>GTTAAGCAGTTCCTCTCATCACG           | Marker assistant selection |

|           |                        |
|-----------|------------------------|
| SSR222042 | TTGAGTCTTTTCCTTTTGAAGA |
|           | CGGCTCGATTTGACTTGATT   |
| SSR112166 | TCCATAAATAGGTTGCCAGTTG |
|           | TCAAACGAGAGGAGTGTTTGA  |

---

**Supplementary Table S2.** List of soybean germplasm used for studying the association between gene expression of salt tolerant gene *Ncl* and their salt tolerance

| No. | Name              | Acession number <sup>a</sup> | Species       | Origin      |
|-----|-------------------|------------------------------|---------------|-------------|
| 1   | 947-DCE-Sj-020-1  | PI222546                     | <i>G. max</i> | Argentina   |
| 2   | FT-Abyara         | PI628838                     | <i>G. max</i> | Brazil      |
| 3   | JinDou No.6       | C058                         | <i>G. max</i> | China       |
| 4   | XinRongDaDou      | C184                         | <i>G. max</i> | China       |
| 5   | Shang Tsai        | PI103079                     | <i>G. max</i> | China       |
| 6   | Great White       | PI165671                     | <i>G. max</i> | China       |
| 7   | Pan-San           | PI171437                     | <i>G. max</i> | China       |
| 8   | No. 3032 Green    | PI171439                     | <i>G. max</i> | China       |
| 9   | No. 3093 Green    | PI171440                     | <i>G. max</i> | China       |
| 10  | Mud-bean          | PI171441                     | <i>G. max</i> | China       |
| 11  | Paoting           | PI179825                     | <i>G. max</i> | China       |
| 12  | Qi Huang No. 10   | PI458512                     | <i>G. max</i> | China       |
| 13  | Lu dou 7          | PI518719                     | <i>G. max</i> | China       |
| 14  | Yue jin 5         | PI518720                     | <i>G. max</i> | China       |
| 15  | S-100             | PI548488                     | <i>G. max</i> | China       |
| 16  | Qi huang No. 1    | PI561375                     | <i>G. max</i> | China       |
| 17  | Niu mao huang     | PI567567                     | <i>G. max</i> | China       |
| 18  | Fen dou 16        | PI574476A                    | <i>G. max</i> | China       |
| 19  | Sixth Moon        | PI60273                      | <i>G. max</i> | China       |
| 20  | 7902              | PI92707                      | <i>G. max</i> | China       |
| 21  | Cibao             | PI153681                     | <i>G. max</i> | El Salvador |
| 22  | No. 15 Seed black | PI164885                     | <i>G. max</i> | Guatemala   |
| 23  | No. 10294         | PI175198                     | <i>G. max</i> | India       |
| 24  | No. 10296         | PI175199                     | <i>G. max</i> | India       |
| 25  | Punjab-1          | PI198078                     | <i>G. max</i> | India       |
| 26  | Local variety     | PI215693                     | <i>G. max</i> | India       |
| 27  | I-1               | PI374163                     | <i>G. max</i> | India       |
| 28  | Kedelee No. 367   | PI133226                     | <i>G. max</i> | Indonesia   |
| 29  | Ringgit           | PI192867                     | <i>G. max</i> | Indonesia   |
| 30  | Reg. No. 27       | PI219652                     | <i>G. max</i> | Indonesia   |
| 31  | Goishi Shirohana  | JP27742                      | <i>G. max</i> | Japan       |
| 32  | Fukui Shiro       | JP27948                      | <i>G. max</i> | Japan       |
| 33  | Chuusei 11        | JP29316                      | <i>G. max</i> | Japan       |

|    |                       |          |               |       |
|----|-----------------------|----------|---------------|-------|
| 34 | Kariyutaka            | JP86520  | <i>G. max</i> | Japan |
| 35 | Chu-chou              | PI157413 | <i>G. max</i> | Japan |
| 36 | No. 24                | PI181544 | <i>G. max</i> | Japan |
| 37 | No. 42                | PI181559 | <i>G. max</i> | Japan |
| 38 | Aka Saya              | PI200446 | <i>G. max</i> | Japan |
| 39 | Aki Daizu No. 1       | PI200448 | <i>G. max</i> | Japan |
| 40 | Amakusa Daizu         | PI200451 | <i>G. max</i> | Japan |
| 41 | Amakusa Nou No. 2     | PI200452 | <i>G. max</i> | Japan |
| 42 | Aokimame              | PI200454 | <i>G. max</i> | Japan |
| 43 | Aso No. 1             | PI200455 | <i>G. max</i> | Japan |
| 44 | Gaku Bun              | PI200466 | <i>G. max</i> | Japan |
| 45 | Kiro Aki Daizu        | PI200488 | <i>G. max</i> | Japan |
| 46 | Shimotsu Ura          | PI200525 | <i>G. max</i> | Japan |
| 47 | Shira Nuhi            | PI200526 | <i>G. max</i> | Japan |
| 48 | Shiro Daizu No. 3     | PI200530 | <i>G. max</i> | Japan |
| 49 | Shiro Daizu           | PI200531 | <i>G. max</i> | Japan |
| 50 | Shiro Hanasaki No. 1  | PI200532 | <i>G. max</i> | Japan |
| 51 | Sugao Zairai          | PI200538 | <i>G. max</i> | Japan |
| 52 | Suzanari              | PI200539 | <i>G. max</i> | Japan |
| 53 | Tamana                | PI200542 | <i>G. max</i> | Japan |
| 54 | Tamanishiki           | PI200543 | <i>G. max</i> | Japan |
| 55 | Waka Shima            | PI200547 | <i>G. max</i> | Japan |
| 56 | Yashiro Zairai No. 1  | PI200549 | <i>G. max</i> | Japan |
| 57 | Yashiro Zairai No. 2  | PI200550 | <i>G. max</i> | Japan |
| 58 | Yonekadake            | PI200551 | <i>G. max</i> | Japan |
| 59 | Tookichi              | PI208788 | <i>G. max</i> | Japan |
| 60 | No. 10    Black Seeds | PI209577 | <i>G. max</i> | Japan |
| 61 | Chasengoku            | PI224269 | <i>G. max</i> | Japan |
| 62 | Yamaguchi-white No. 1 | PI228065 | <i>G. max</i> | Japan |
| 63 | No. 3                 | PI230970 | <i>G. max</i> | Japan |
| 64 | No. 4                 | PI230971 | <i>G. max</i> | Japan |
| 65 | No. 6                 | PI230973 | <i>G. max</i> | Japan |
| 66 | No. 12                | PI230979 | <i>G. max</i> | Japan |
| 67 | Kurosengoku           | PI423886 | <i>G. max</i> | Japan |
| 68 | Tousan 76             | PI507414 | <i>G. max</i> | Japan |
| 69 | Mammoth Yellow        | PI548469 | <i>G. max</i> | Japan |

|     |                         |          |               |               |
|-----|-------------------------|----------|---------------|---------------|
| 70  | Tokyo                   | PI548493 | <i>G. max</i> | Japan         |
| 71  | Tachiyutaka             | PI594289 | <i>G. max</i> | Japan         |
| 72  | Kurakake Daizu          | PI81037  | <i>G. max</i> | Japan         |
| 73  | Koshoku Akidaizu        | PI85897  | <i>G. max</i> | Japan         |
| 74  | Oyachi Senshitsuadairyu | PI86113  | <i>G. max</i> | Japan         |
| 75  | Kiizaya                 | PI94159  | <i>G. max</i> | Japan         |
| 76  | 0197                    | PI471938 | <i>G. max</i> | Nepal         |
| 77  | TGM 693                 | PI429328 | <i>G. max</i> | Nigeria       |
| 78  | Honduras                | PI159924 | <i>G. max</i> | Peru          |
| 79  | Glycine H               | PI159925 | <i>G. max</i> | Peru          |
| 80  | Tumbes                  | PI159927 | <i>G. max</i> | Peru          |
| 81  | No. 430                 | PI215755 | <i>G. max</i> | Peru          |
| 82  | 41S31                   | PI159095 | <i>G. max</i> | South Africa  |
| 83  | Chonbuk, Sosan          | K099     | <i>G. max</i> | South Korea   |
| 84  | White-soybean           | PI157488 | <i>G. max</i> | South Korea   |
| 85  | No. 27    Seeds black   | PI181697 | <i>G. max</i> | Suriname      |
| 86  | Ringgit                 | PI204335 | <i>G. max</i> | Suriname      |
| 87  | Seedcoat black          | PI210178 | <i>G. max</i> | Taiwan        |
| 88  | Williams 82             | PI518671 | <i>G. max</i> | United States |
| 89  | Flyer                   | PI534646 | <i>G. max</i> | United States |
| 90  | Hartwig                 | PI543795 | <i>G. max</i> | United States |
| 91  | Peking                  | PI548402 | <i>G. max</i> | United States |
| 92  | Avoyelles               | PI548442 | <i>G. max</i> | United States |
| 93  | Barchet                 | PI548443 | <i>G. max</i> | United States |
| 94  | Biloxi                  | PI548444 | <i>G. max</i> | United States |
| 95  | CNS                     | PI548445 | <i>G. max</i> | United States |
| 96  | Cherokee                | PI548447 | <i>G. max</i> | United States |
| 97  | Clemson                 | PI548448 | <i>G. max</i> | United States |
| 98  | Georgian                | PI548455 | <i>G. max</i> | United States |
| 99  | Otootan                 | PI548479 | <i>G. max</i> | United States |
| 100 | Pine Dell Perfection    | PI548481 | <i>G. max</i> | United States |
| 101 | Rose Non Pop            | PI548487 | <i>G. max</i> | United States |
| 102 | Union                   | PI548622 | <i>G. max</i> | United States |
| 103 | Hill                    | PI548654 | <i>G. max</i> | United States |
| 104 | Forrest                 | PI548655 | <i>G. max</i> | United States |
| 105 | Lee                     | PI548656 | <i>G. max</i> | United States |

|     |          |          |                |               |
|-----|----------|----------|----------------|---------------|
| 106 | Jackson  | PI548657 | <i>G. max</i>  | United States |
| 107 | Davis    | PI553039 | <i>G. max</i>  | United States |
| 108 | Cook     | PI553045 | <i>G. max</i>  | United States |
| 109 | Lee 68   | PI559369 | <i>G. max</i>  | United States |
| 110 | Young    | PI633743 | <i>G. max</i>  | United States |
| 111 | NILs18-T | -        | <i>G. max</i>  | -             |
| 112 | NILs18-S | -        | <i>G. max</i>  | -             |
| 113 | NILs25-T | -        | <i>G. max</i>  | -             |
| 114 | NILs25-S | -        | <i>G. max</i>  | -             |
| 115 | NILs72-T | -        | <i>G. max</i>  | -             |
| 116 | NILs72-S | -        | <i>G. max</i>  | -             |
| 117 | JWS061-1 | -        | <i>G. soja</i> | Japan         |
| 118 | CED98004 | JP110728 | <i>G. soja</i> | Japan         |
| 119 | CED98010 | JP110730 | <i>G. soja</i> | Japan         |
| 120 | CED98011 | JP110731 | <i>G. soja</i> | Japan         |
| 121 | CED98016 | JP110732 | <i>G. soja</i> | Japan         |
| 122 | CED97206 | JP90964  | <i>G. soja</i> | Japan         |
| 123 | CED97210 | JP90967  | <i>G. soja</i> | Japan         |

---

<sup>a</sup>: accessions with a PI number were provide by the GRIN, USDA, USA; accessions with a JP number were provided by the NIAS Genebank, Japan; C057, C184, and K099 are provided by the Legume Base, National Bioresource Project (<http://www.legumebase.brc.miyazaki-u.ac.jp/about.jsp>)

## Reference

46. Tamura, K., Stecher, G., Peterson, D., Filipski, A. & Kumar, S. MEGA6: Molecular Evolutionary Genetics Analysis version 6.0. *Mol. Biol. Evol.* **30**, 2725–2729 (2013).
